# Supplementary material for: Combinatorial non-covalent assembly of graphene oxide and chromophores into hybrid nanofilms for organic electronics
Source: Royal Society of Chemistry journal article supplement (doi:10.1039/d2nj05281d), 2023-01-01
Supplement: d2nj05281d1.pdf [file d2nj05281d1.pdf]

Supporting Information

## Combinatorial non-covalent assembly of graphene oxide and chromophores into hybrid nanofilms for organic electronics

Elizaveta A. Gusarova, Alexandra I. Zvyagina, Alexey E. Aleksandrov, Alexey A. Averin,  
Alexey R. Tameev, and Maria A. Kalinina\*

Frumkin Institute of Physical Chemistry and Electrochemistry RAS, Moscow, Russia 119071

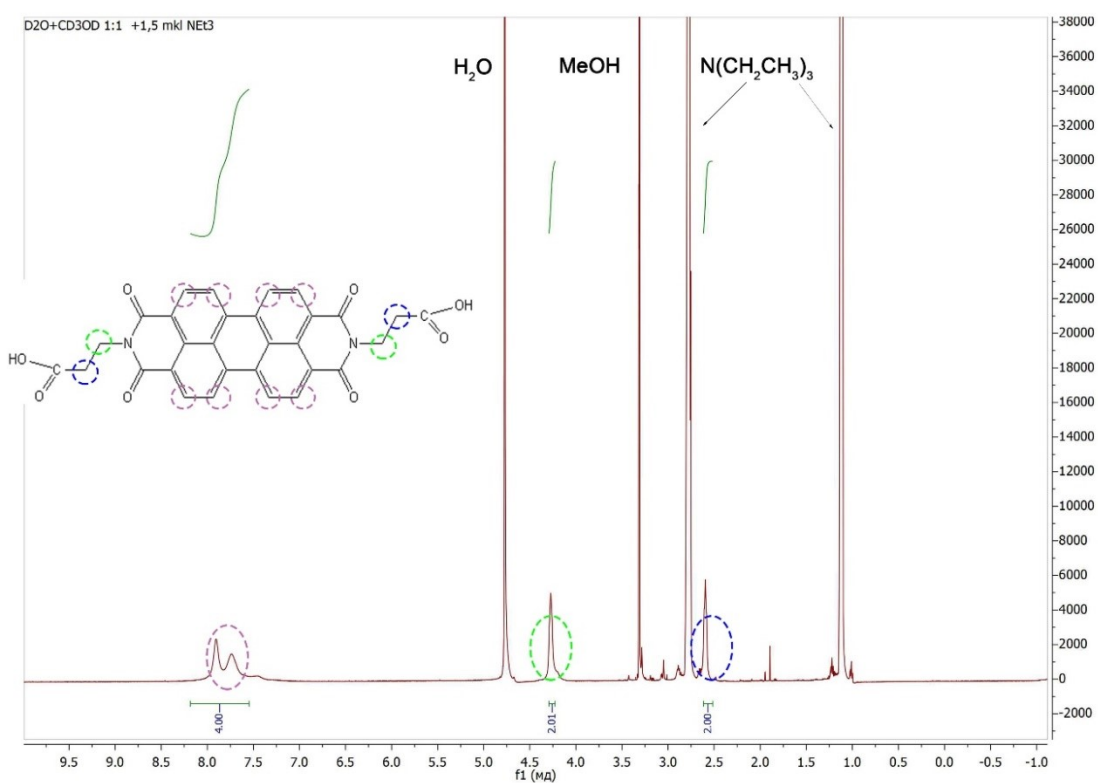

**Figure S1.** <sup>1</sup>H NMR spectra of PDI-PA in a mixture of CD<sub>3</sub>OD/D<sub>2</sub>O (1:1) in the presence of 1.5 μL of N(Et)<sub>3</sub>.

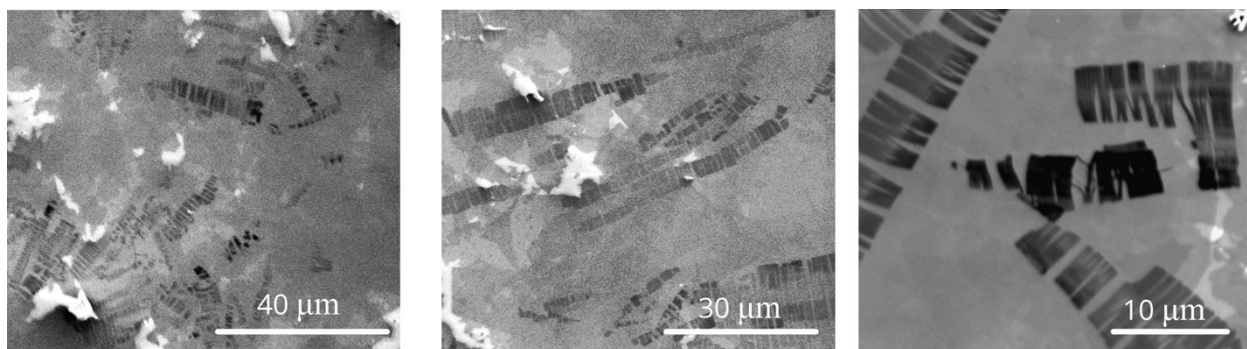

**Figure S2.** SEM microphotographs of GO/M<sup>2+</sup>/PDA hybrid coatings obtained at different magnifications. Hybrid materials GO/M<sup>2+</sup>/PDA and GO/M<sup>2+</sup>/PDI-PA/M<sup>2+</sup>/PDA have a similar morphology. The differences can be assessed only by AFM.

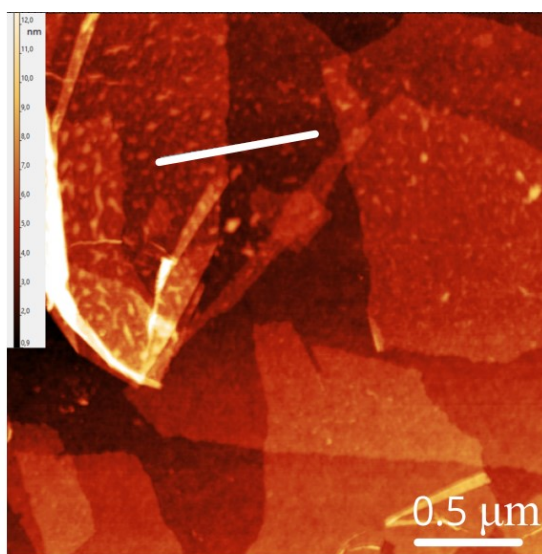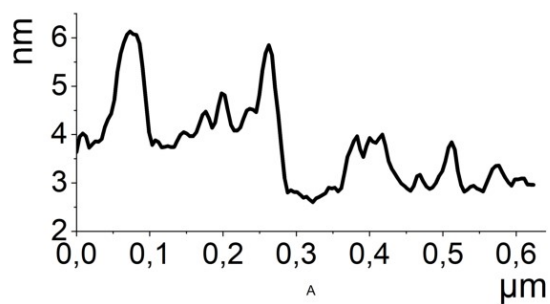

**Figure S3.** AFM image and corresponding surface profile for GO/Co<sup>2+</sup>/PDI-PA hybrid nanofilm.

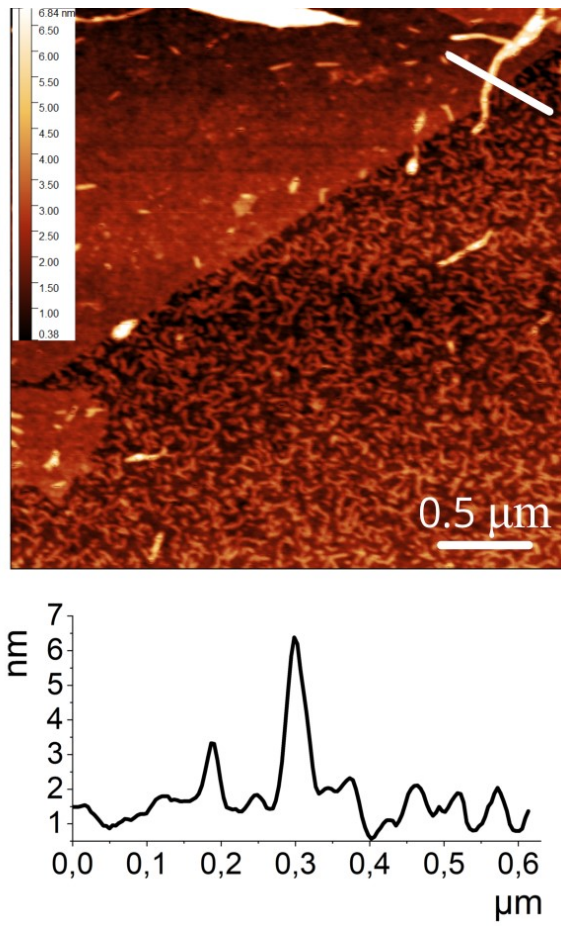

**Figure S4.** AFM image and corresponding surface profile for GO/Zn<sup>2+</sup>/PDI-PA hybrid nanofilm.

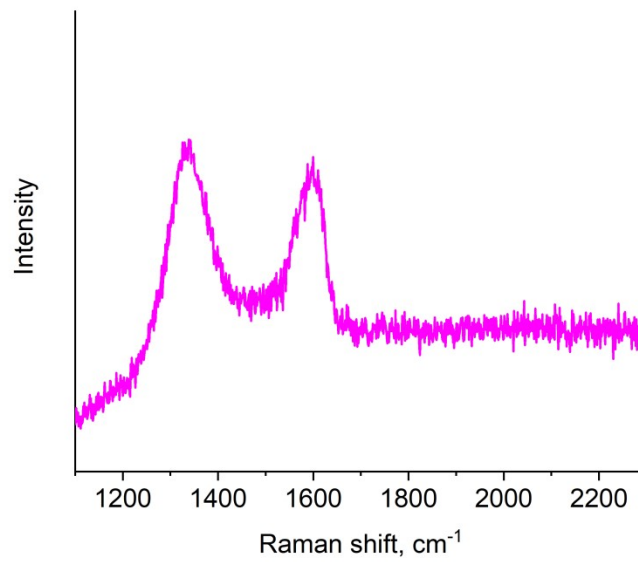

**Figure S5.** Raman spectrum of metal-free GO/PDI-PA film.

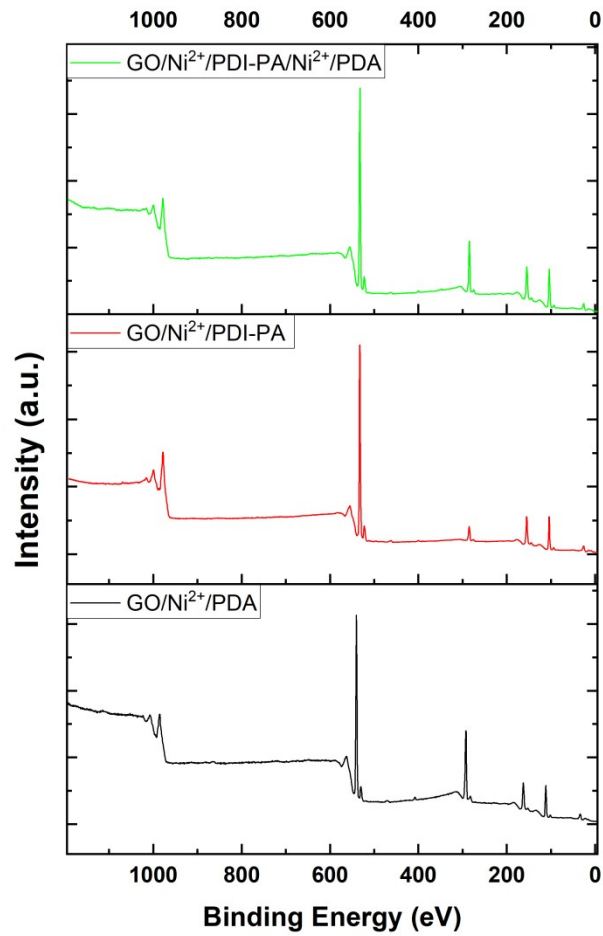

**Figure S6.** Overview XPS spectra of GO/Ni<sup>2+</sup>/PDA, GO/Ni<sup>2+</sup>/PDI-PA and GO/Ni<sup>2+</sup>/PDI-PA/Ni<sup>2+</sup>/PDA hybrid materials.

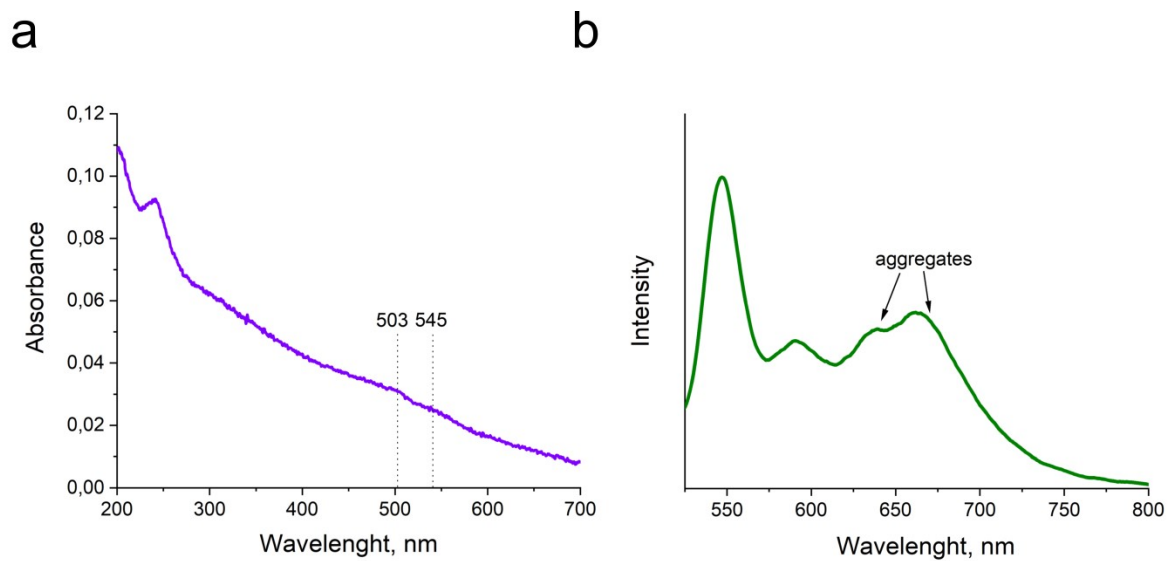

**Figure S7.** a) UV-vis spectrum and b) fluorescence spectrum of GO/Co<sup>2+</sup>/PDI-PA film.

**a**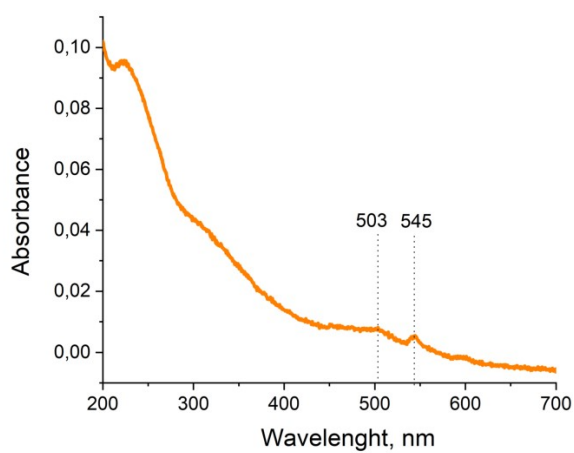**b**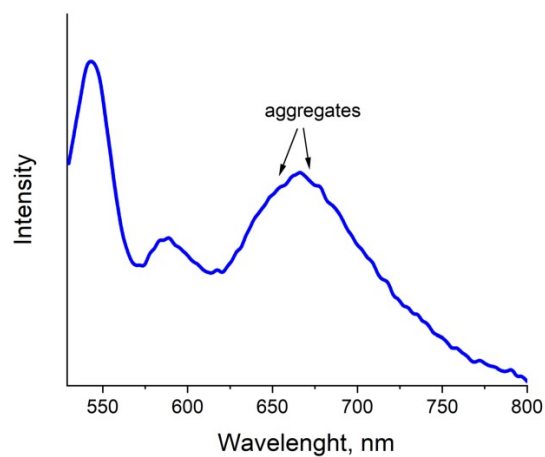

**Figure S8.** a) UV-vis spectrum and b) fluorescence spectrum of GO/Zn<sup>2+</sup>/PDI-PA film.

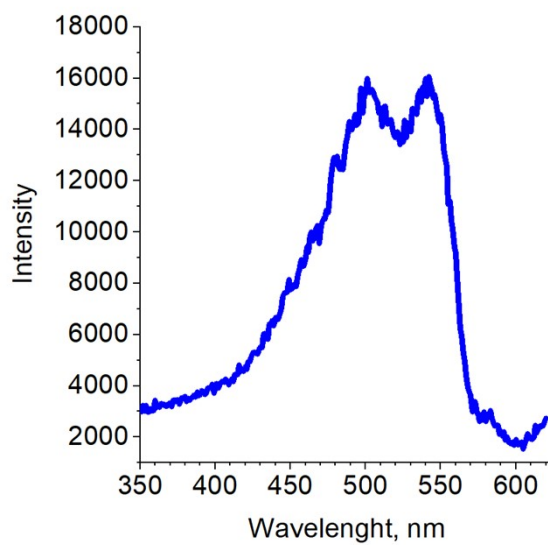

**Figure S9.** Excitation spectrum of PDA film, crystallized in the «red» form.  $\lambda_{em}=640$  nm.

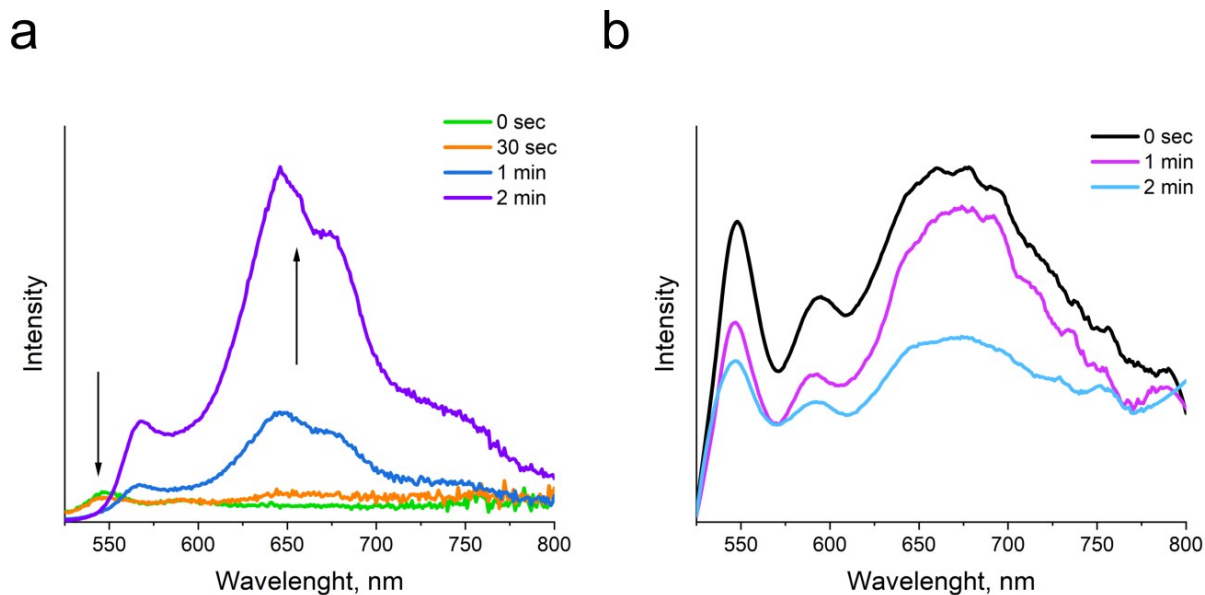

**Figure S10.** Fluorescence spectra of a) GO/Ni<sup>2+</sup>/PDI-PA/PDA and b) GO/Ni<sup>2+</sup>(OAc)<sub>2</sub>/PDI-PA/Ni<sup>2+</sup>(OAc)<sub>2</sub>/PDA hybrid films recorded after 0 sec; 30 sec; 1 min and 2 min of the UV irradiation onset.

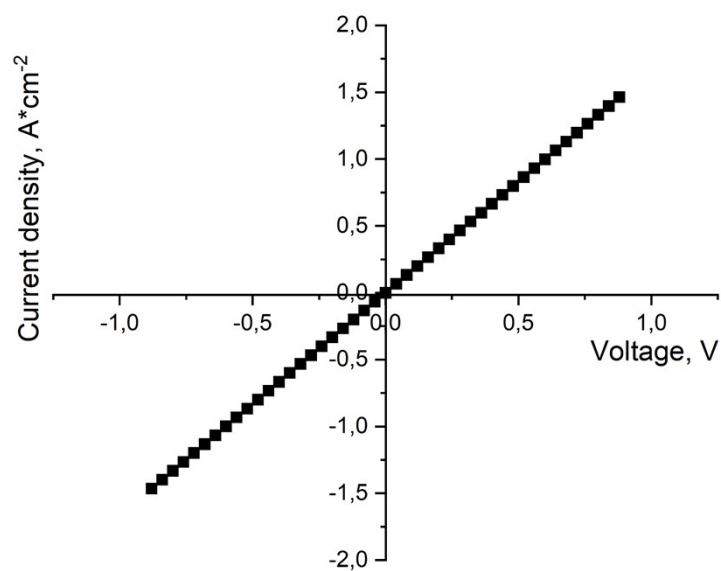

**Figure S11.** Current-voltage dependence of the ITO/2-TNATA/Al cell.

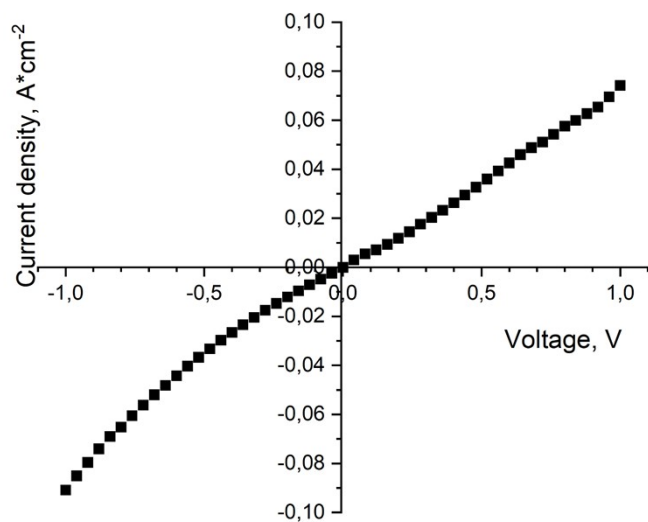

**Figure S12.** Current-voltage dependence of the ITO/GO/2-TNATA/Al cell.

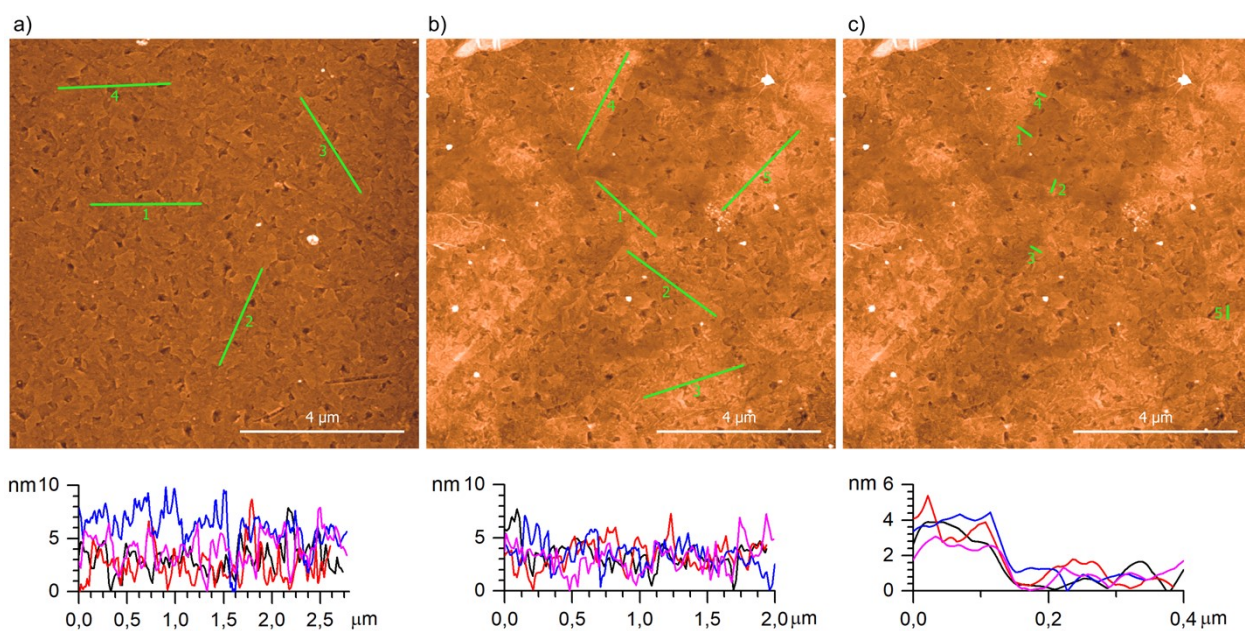

**Figure S13.** AFM images and corresponding surface profiles for a) pure ITO surface and b,c) ITO+GO surface.

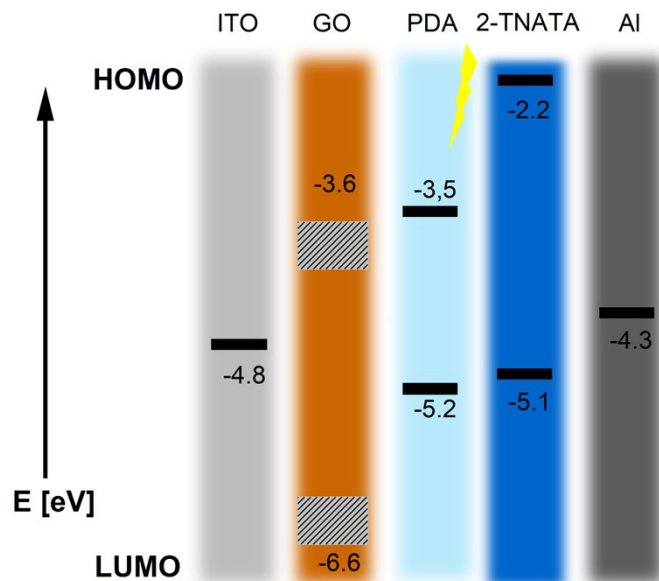

**Figure S14.** a) Schematically shown energy level diagram for the ITO/GO/PDA/2-TNATA/Al cell.

The HOMO and LUMO energies of GO, PDA, PDI-PA and work function of ITO, aluminum were taken from <sup>1-5</sup>. The values for 2-TNATA, C<sub>60</sub> and BCP provided by the manufacturer.

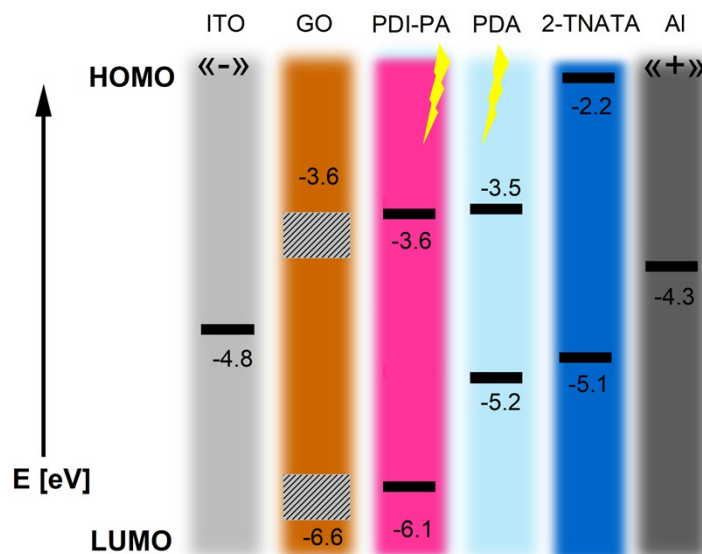

**Figure S15.** Schematically shown energy level diagram for the ITO/GO/Ni<sup>2+</sup>/PDI-PA/Ni<sup>2+</sup>/PDA/2-TNATA/Al cell.



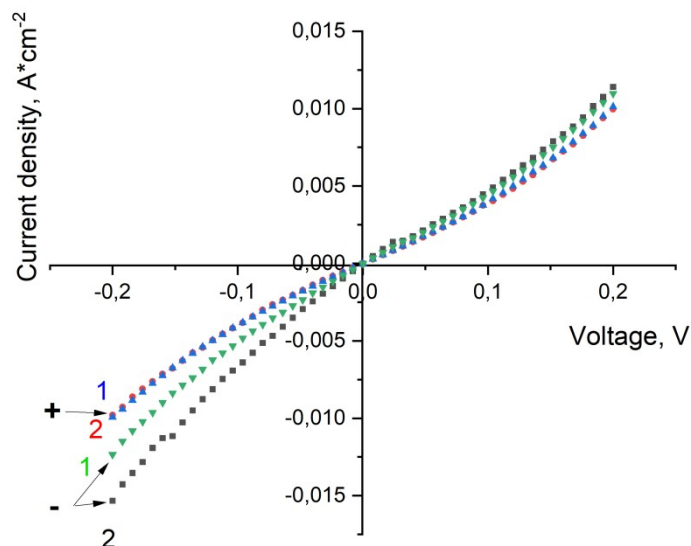

**Figure S16.** Current-voltage dependences of the ITO/GO/Ni<sup>2+</sup>/PDI-PA/PDA/2-TNATA/Al cell measured for (1) photocurrent and (2) dark current under positive and negative bias on ITO.

**Table S1.** Values of  $\epsilon_1$ ,  $\epsilon_2$  and dielectric permittivity, obtained by ellipsometry, and RMS error of optical modeling.

|              |                       |
|--------------|-----------------------|
| $\epsilon_1$ | 2.768                 |
| $\epsilon_2$ | 0.664                 |
| $\epsilon$   | 2.847                 |
| RMSE         | $6.18 \times 10^{-8}$ |

Ellipsometry allows to determine experimentally the real ( $\epsilon_1$ ) and imaginary parts ( $\epsilon_2$ ) of the (complex) dielectric permittivity, from which the dielectric permittivity of GO/Ni<sup>2+</sup>/PDI-PA/Ni<sup>2+</sup>/PDA/2-TNATA film was calculated:

$$\epsilon = \epsilon_1 + i \epsilon_2$$

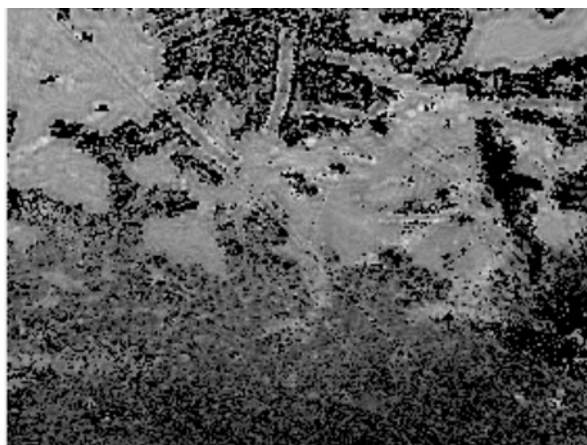

**Figure S17.** The area of the GO/Ni<sup>2+</sup>/PDI-PA/Ni<sup>2+</sup>/PDA/2-TNATA film from which the ellipsometric data were scanned.

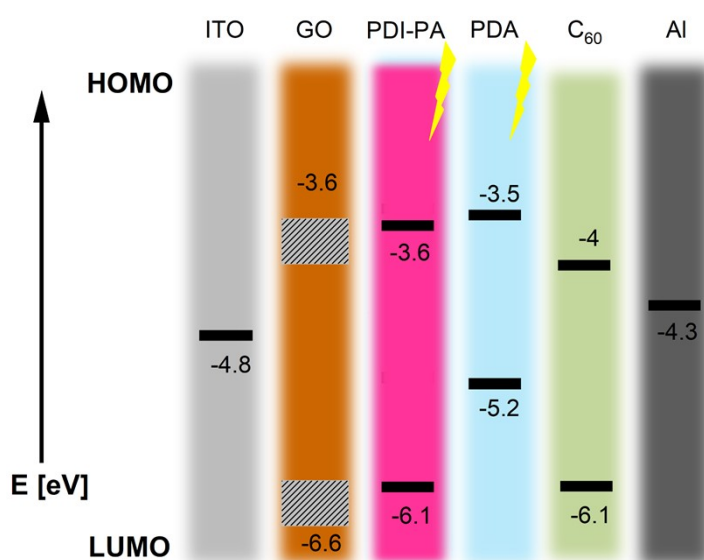

**Figure S18.** Schematically shown energy level diagram for the ITO/GO/Ni<sup>2+</sup>/PDI-PA/Ni<sup>2+</sup>/PDA/C<sub>60</sub>/Al cell.

## References

- (1) Zheng, F.; Xu, W. L.; Jin, H. D.; Hao, X. T.; Ghiggino, K. P. Charge Transfer from Poly(3-Hexylthiophene) to Graphene Oxide and Reduced Graphene Oxide. *RSC Adv.* **2015**, *5* (109), 89515–89520.
- (2) Nishide, J. I.; Oyamada, T.; Akiyama, S.; Sasabe, H.; Adachi, C. High Field-Effect Mobility in an Organic Thin-Film Transistor with a Solid-State Polymerized Polydiacetylene Film as an Active Layer. *Adv. Mater.* **2006**, *18* (23), 3120–3124.

- (3) Carmen Ruiz Delgado, M.; Kim, E. G.; Da Silva Filho, D. A.; Bredas, J. L. Tuning the Charge-Transport Parameters of Perylene Diimide Single Crystals via End and/or Core Functionalization: A Density Functional Theory Investigation. *J. Am. Chem. Soc.* **2010**, *132* (10), 3375–3387.
- (4) Balasubramanian, N.; Subrahmanyam, A. Studies on Evaporated Indium Tin Oxide (ITO)/Silicon Junctions and an Estimation of ITO Work Function. *J. Electrochem. Soc.* **1991**, *138* (1), 322–324.
- (5) Michaelson, H. B.; Michaelson, H. B. The Work Function of the Elements and Its Periodicity The Work Function of the Elements and Its Periodicity. **2012**, *4729* (1977), 1–6.
